# Supplementary material
Source: PubMed Central journal article supplement (PMC7049971)
Supplement: supp_RA119.011469_156445_1_supp_461720_q4fj6l.pdf [file supp_RA119.011469_156445_1_supp_461720_q4fj6l.pdf]

Crystallographic analysis of *Staphylococcus aureus* LcpA, the primary wall teichoic acid ligase

**Franco K. K. Li<sup>1,2</sup>, Federico I. Rosell<sup>1,2</sup>, Robert T. Gale<sup>3</sup>, Jean-Pierre Simorre<sup>4</sup>, Eric D. Brown<sup>3</sup>,  
Natalie C. J. Strynadka<sup>1,2\*</sup>**

From the <sup>1</sup>Department of Biochemistry and Molecular Biology, The University of British Columbia, Vancouver, British Columbia, Canada; <sup>2</sup>Centre for Blood Research, The University of British Columbia, Vancouver, British Columbia, Canada; <sup>3</sup>Department of Biochemistry and Biomedical Sciences, Michael G. DeGroot Institute for Infectious Disease Research, McMaster University, Hamilton, Ontario, Canada; <sup>4</sup>Univ. Grenoble Alpes, CNRS, CEA, Institut de Biologie Structurale (IBS), 71 avenue des Martyrs, 38000, Grenoble, France.

Running Title: Crystallographic analysis of LytR-CpsA-Psr enzymes

\*To whom correspondence should be addressed: Natalie C.J. Strynadka: Department of Biochemistry and Molecular Biology, The University of British Columbia, Life Sciences Centre, 2350 Health Sciences Mall, Vancouver, BC V6T 1Z3, Canada; ncjs@mail.ubc.ca; Tel. (604) 822-7729; Fax. (604) 822-5227.

**TABLE OF CONTENTS**

|                 |    |
|-----------------|----|
| Table S1 .....  | 2  |
| Table S2 .....  | 3  |
| Table S3 .....  | 3  |
| Table S4 .....  | 5  |
| Figure S1 ..... | 6  |
| Figure S2 ..... | 7  |
| Figure S3 ..... | 8  |
| Figure S4 ..... | 9  |
| Figure S5 ..... | 10 |
| Figure S6 ..... | 11 |
| Figure S7 ..... | 12 |

**Table S1. List of LCP enzyme structures**

| PDB ID | Enzyme                                            | Resolution (Å) | Ligands at substrate binding sites                     | Sequence identity compared to <i>S. aureus</i> LcpA (%) |           | Ca RMSD compared to <i>S. aureus</i> LcpA |                                   | Year | Publication                                     |
|--------|---------------------------------------------------|----------------|--------------------------------------------------------|---------------------------------------------------------|-----------|-------------------------------------------|-----------------------------------|------|-------------------------------------------------|
|        |                                                   |                |                                                        | Overall                                                 | Structure | Structure                                 | Active site <sup>a</sup>          |      |                                                 |
| 6UEX   | <i>S. aureus</i> LcpA                             | 1.90           | C <sub>40</sub> -PP-GlcNAc                             | 100                                                     | 100       | -                                         | -                                 | 2019 | This work                                       |
| 6UF5   | <i>B. subtilis</i> TagT                           | 2.80           | -                                                      | 25.9                                                    | 31.5      | 3.40 Å over 214 residues                  | 0.85 Å over 10 residues           |      |                                                 |
| 6UF6   | <i>B. subtilis</i> TagU (SeMet)                   | 2.20           | -                                                      | 26.2                                                    | 28.8      | 5.60 Å over 222 residues                  | 2.02 Å over 10 residues           |      |                                                 |
| 6UF3   | <i>B. subtilis</i> TagV                           | 1.60           | -                                                      | 27.4                                                    | 28.8      | 3.19 Å over 235 residues                  | 1.10 Å over 10 residues           |      |                                                 |
| 5V8C   | <i>Actinomyces oris</i> LyrR-Csp2A-Psr            | 2.51           | PEG4000 and PO <sub>4</sub> <sup>3-</sup>              | 18.3                                                    | 19.2      | 6.01 Å over 216 residues                  | 2.00 Å over 10 residues           | 2019 | Doi: 10.1128/mBio.01580-18 (1)                  |
| 6MPT   | <i>B. subtilis</i> TagT                           | 1.65           | C <sub>30</sub> -PP-GlcNAc                             | 25.9                                                    | 29.1      | 3.35 Å over 215 residues                  | 1.04 Å over 10 residues           | 2018 | Doi: 10.1021/jacs.7b13551 (2)                   |
| 6MPS   | <i>B. subtilis</i> TagT                           | 1.86           | C <sub>30</sub> -PP-GlcNAc-ManNAc and Mg <sup>2+</sup> | 25.9                                                    | 29.1      | 3.22 Å over 216 residues                  | 0.85 Å over 10 residues           |      |                                                 |
| 4OBM   | <i>Eubacterium siraeum</i> DSM 15702 EUBSIR_01389 | 2.15           | Tetraethylene glycol and PEG 400                       | 14.7                                                    | 15.8      | 5.94 Å over 227 residues                  | 2.54 Å over 10 residues           | 2014 | Joint Center for Structural Genomics (JCSG)     |
| 4DE9   | <i>B. subtilis</i> TagT                           | 1.79           | C <sub>40</sub> -PP                                    | 25.9                                                    | 29.1      | 3.06 Å over 208 residues                  | 0.97 Å over 9 residues            | 2012 | Doi: 10.1089/mdr.2011.0232 (3)                  |
| 4DE8   | <i>S. pneumoniae</i> Cps2A (R267A)                | 1.95           | C <sub>40</sub> -P                                     | 23.8                                                    | 22.5      | 5.66 Å over 241 residues                  | 1.07 Å over 10 residues           |      |                                                 |
| 2XXP   | <i>S. pneumoniae</i> Cps2A                        | 1.69           | C <sub>50</sub> -P (mono-trans, octa-cis)              | 23.8                                                    | 22.9      | 5.62 Å over 241 residues                  | 1.02 Å over 10 residues           | 2011 | Doi: 10.1038/emboj.2011.358 (4)                 |
| 3TEP   | <i>S. pneumoniae</i> Cps2A                        | 2.03           | C <sub>40</sub> -PP and Mg <sup>2+</sup>               | 23.8                                                    | 22.9      | 5.73 Å over 241 residues                  | 0.95 Å over 10 residues           |      |                                                 |
| 3TFL   | <i>S. pneumoniae</i> Cps2A                        | 2.05           | C <sub>40</sub> -PP                                    | 23.8                                                    | 22.9      | 5.55 Å over 240 residues                  | 1.02 Å over 10 residues           |      |                                                 |
| 2XXQ   | <i>S. pneumoniae</i> Cps2A (R267A)                | 1.77           | C <sub>40</sub> -PP                                    | 23.8                                                    | 22.5      | 5.64 Å over 241 residues                  | 1.01 Å over 10 residues           |      |                                                 |
| 3TEL   | <i>S. pneumoniae</i> Cps2A                        | 1.80           | C <sub>40</sub> -PP and Mn <sup>2+</sup>               | 23.8                                                    | 22.5      | 5.62 Å over 241 residues                  | 1.05 Å over 10 residues           |      |                                                 |
| 3QFI   | <i>Enterococcus faecalis</i> EF0465               | 2.71           | -                                                      | 26.1                                                    | 28.4      | 2.53 Å over 227 residues                  | 1.09 Å over 9 residues            |      |                                                 |
| 3NXH   | <i>B. subtilis</i> TagV                           | 2.59           | -                                                      | 27.4                                                    | 32.5      | 3.98 Å over 201 residues                  | 1.61 Å over 8 residues            | 2010 | Northeast Structural Genomics Consortium (NESG) |
| 3PE5   | <i>Clostridium leptum</i> A7VV38_9CLOT            | 2.38           | -                                                      | 26.4                                                    | 27.9      | 3.64 Å over 241 residues                  | 3.66 Å over 10 residues (chain B) | 2010 |                                                 |
| 3OWQ   | <i>Listeria innocua</i> Lin1025                   | 2.61           | Di(hydroxyethyl)ether                                  | 22.0                                                    | 24.9      | 4.39 Å over 228 residues                  | 2.85 Å over 10 residues (chain A) | 2010 |                                                 |
| 3NRO   | <i>Listeria monocytogenes</i> Lmo1026             | 2.90           | -                                                      | 22.4                                                    | 25.3      | 4.57 Å over 219 residues                  | 2.93 Å over 10 residues (chain B) | 2010 |                                                 |
| 3MEJ   | <i>B. subtilis</i> TagT                           | 2.49           | -                                                      | 25.9                                                    | 29.1      | 3.08 Å over 218 residues                  | 1.46 Å over 10 residues           | 2010 |                                                 |
| 3OKZ   | <i>Streptococcus algalactiae</i> gbs0355          | 2.70           | -                                                      | 25.7                                                    | 25.9      | 3.42 Å over 235 residues                  | 0.89 Å over 10 residues (chain A) | 2010 |                                                 |

<sup>a</sup> Active site RMSD values were calculated with 10 conserved active site residues (*S. aureus* LcpA D91, R99, D101, R122, D123, K135, R216, R218, D224, R227).

**Table S2. Summary of mutagenesis analyses of LCP enzymes**

| <b>LcpA<sub>SA</sub> residue</b> | <b>Location/proposed role</b>                         | <b>Mutagenesis analysis</b>                                                                                                                                                                                                                                                                                                                                                                                                                                                                                   |
|----------------------------------|-------------------------------------------------------|---------------------------------------------------------------------------------------------------------------------------------------------------------------------------------------------------------------------------------------------------------------------------------------------------------------------------------------------------------------------------------------------------------------------------------------------------------------------------------------------------------------|
| D91                              | Mg <sup>2+</sup> coordination                         | <ul style="list-style-type: none"> <li>• LcpB<sub>SA</sub> (31-405) D70A – No activity <i>in vitro</i> (2)</li> <li>• TagT<sub>BS</sub> (46-323) D82A – Significant decrease in activity <i>in vitro</i> (2)</li> <li>• TagU<sub>BS</sub> D75A – Unable to sustain growth in the absence of WT TagT, TagU and TagV (4)</li> <li>• LcpA<sub>CG</sub> D88A – Failed to complement growth when WT LcpA expression was suppressed. Recombinant enzyme has pyrophosphatase activity <i>in vitro</i> (5)</li> </ul> |
| R99                              | PG binding                                            | <ul style="list-style-type: none"> <li>• TagU<sub>BS</sub> R83A – Unable to sustain growth in the absence of WT TagT, TagU and TagV (4)</li> <li>• LcpA<sub>AO</sub> R128A – Glycosylation of GspA was unaffected (1)</li> </ul>                                                                                                                                                                                                                                                                              |
| D101                             | Mg <sup>2+</sup> coordination                         | <ul style="list-style-type: none"> <li>• TagT<sub>BS</sub> (46-323) D97A – No activity <i>in vitro</i> (2)</li> <li>• TagU<sub>BS</sub> D85A – Unable to sustain growth in the absence of WT TagT, TagU and TagV (4)</li> </ul>                                                                                                                                                                                                                                                                               |
| S102                             | Interior of lipid binding pocket                      | <ul style="list-style-type: none"> <li>• TagU<sub>BS</sub> T86F – Unable to sustain growth in the absence of WT TagT, TagU and TagV (4)</li> </ul>                                                                                                                                                                                                                                                                                                                                                            |
| R122                             | General base                                          | <ul style="list-style-type: none"> <li>• TagT<sub>BS</sub> (46-323) R118A – No activity <i>in vitro</i> (2)</li> <li>• LcpA<sub>CG</sub> R138A – Failed to complement growth when WT LcpA expression was suppressed. Recombinant enzyme has pyrophosphatase activity <i>in vitro</i> (5)</li> <li>• LcpA<sub>AO</sub> R149A – Glycosylation of GspA was defective (equivalent to the <math>\Delta lcpA</math> mutant). Recombinant enzyme has no pyrophosphatase activity <i>in vitro</i> (1)</li> </ul>      |
| D123                             | Activation of general base                            | <ul style="list-style-type: none"> <li>• TagT<sub>BS</sub> (46-323) D119T – No activity <i>in vitro</i> (2)</li> </ul>                                                                                                                                                                                                                                                                                                                                                                                        |
| K135                             | PG binding                                            | <ul style="list-style-type: none"> <li>• TagT<sub>BS</sub> (46-323) K131A – No activity <i>in vitro</i> (2)</li> </ul>                                                                                                                                                                                                                                                                                                                                                                                        |
| E146                             | Solvent exposed surface of helix 2                    | <ul style="list-style-type: none"> <li>• LcpA<sub>SA</sub> E146K – Increased resistance to vancomycin (6)</li> </ul>                                                                                                                                                                                                                                                                                                                                                                                          |
| A215                             | Interior of lipid binding pocket                      | <ul style="list-style-type: none"> <li>• TagU<sub>BS</sub> T197F – Unable to sustain growth in the absence of WT TagT, TagU and TagV (4)</li> </ul>                                                                                                                                                                                                                                                                                                                                                           |
| R216                             | General acid                                          | <ul style="list-style-type: none"> <li>• LcpA<sub>CG</sub> R257A – Failed to complement growth when WT LcpA expression was suppressed. Recombinant enzyme has pyrophosphatase activity <i>in vitro</i> (5)</li> </ul>                                                                                                                                                                                                                                                                                         |
| R218                             | Donor substrate binding                               | <ul style="list-style-type: none"> <li>• TagT<sub>BS</sub> (46-323) R219A – No activity <i>in vitro</i> (2)</li> </ul>                                                                                                                                                                                                                                                                                                                                                                                        |
| D224                             | PG binding                                            | <ul style="list-style-type: none"> <li>• TagT<sub>BS</sub> (46-323) D224A – Significant decrease in activity <i>in vitro</i> (2)</li> </ul>                                                                                                                                                                                                                                                                                                                                                                   |
| R227                             | Donor substrate binding                               | <ul style="list-style-type: none"> <li>• TagT<sub>BS</sub> (46-323) R227A – No activity <i>in vitro</i> (2)</li> <li>• LcpA<sub>AO</sub> R266A – Glycosylation of GspA was defective (equivalent to the <math>\Delta lcpA</math> mutant) (1)</li> </ul>                                                                                                                                                                                                                                                       |
| (LcpA <sub>AO</sub> C179)        | Helix 2; stability of actinobacterial LCP proteins    | <ul style="list-style-type: none"> <li>• LcpA<sub>AO</sub> C179A/C365A – Glycosylation of GspA was reduced. Recombinant enzyme displays low thermostability and reduced pyrophosphatase activity <i>in vitro</i> (1)</li> </ul>                                                                                                                                                                                                                                                                               |
| (LcpA <sub>AO</sub> C365)        | C-terminus; stability of actinobacterial LCP proteins | <ul style="list-style-type: none"> <li>• LcpA<sub>AO</sub> C365A – Glycosylation of GspA was reduced (1)</li> <li>• LcpA<sub>AO</sub> C179A/C365A – Glycosylation of GspA was reduced. Recombinant enzyme displays low thermostability and reduced pyrophosphatase activity <i>in vitro</i> (1)</li> </ul>                                                                                                                                                                                                    |

**Table S3. Statistics of the top 3 triGlcNAc-bound LcpA<sub>SA</sub> clusters generated with HADDOCK2.2**

| Cluster number                                    | 1              | 3              | 5              |
|---------------------------------------------------|----------------|----------------|----------------|
| HADDOCK score                                     | -47.6 +/- 4.3  | -43.0 +/- 1.6  | -37.4 +/- 6.4  |
| Cluster size                                      | 25             | 10             | 8              |
| RMSD from the overall lowest-energy structure (Å) | 1.4 +/- 0.8    | 1.9 +/- 0.1    | 1.7 +/- 0.1    |
| Van der Waals energy (kcal/mol)                   | -21.0 +/- 4.2  | -24.2 +/- 3.6  | -16.7 +/- 3.7  |
| Electrostatic energy (kcal/mol)                   | -21.6 +/- 18.1 | -9.9 +/- 15.7  | -29.8 +/- 4.6  |
| Desolvation energy (kcal/mol)                     | -22.4 +/- 7.0  | -17.0 +/- 3.6  | -14.8 +/- 6.8  |
| Restraints violation energy (kcal/mol)            | 1.6 +/- 0.76   | 2.2 +/- 1.36   | 1.2 +/- 1.03   |
| Buried Surface Area (Å <sup>2</sup> )             | 657.6 +/- 69.2 | 630.7 +/- 29.0 | 564.8 +/- 45.5 |
| Z-Score                                           | -2.1           | -1.1           | 0.2            |

**Table S4. Statistics of the top 3 triGlcNAc-bound TagT<sub>BS</sub> clusters generated with HADDOCK2.2**

| Cluster number                                    | 1              | 2              | 3              |
|---------------------------------------------------|----------------|----------------|----------------|
| HADDOCK score                                     | -48.5 +/- 3.0  | -45.5 +/- 1.9  | -43.6 +/- 2.8  |
| Cluster size                                      | 25             | 16             | 9              |
| RMSD from the overall lowest-energy structure (Å) | 3.6 +/- 0.2    | 3.8 +/- 0.9    | 3.1 +/- 0.6    |
| Van der Waals energy (kcal/mol)                   | -23.4 +/- 1.5  | -23.2 +/- 2.1  | -22.3 +/- 2.4  |
| Electrostatic energy (kcal/mol)                   | -51.2 +/- 19.0 | -38.9 +/- 16.9 | -28.2 +/- 7.3  |
| Desolvation energy (kcal/mol)                     | -15.0 +/- 7.1  | -14.8 +/- 2.8  | -16.0 +/- 2.4  |
| Restraints violation energy (kcal/mol)            | 1.7 +/- 0.33   | 2.5 +/- 0.95   | 2.9 +/- 1.05   |
| Buried Surface Area (Å <sup>2</sup> )             | 689.9 +/- 27.3 | 669.9 +/- 46.9 | 660.7 +/- 44.8 |
| Z-Score                                           | -2.5           | -1.2           | -0.4           |

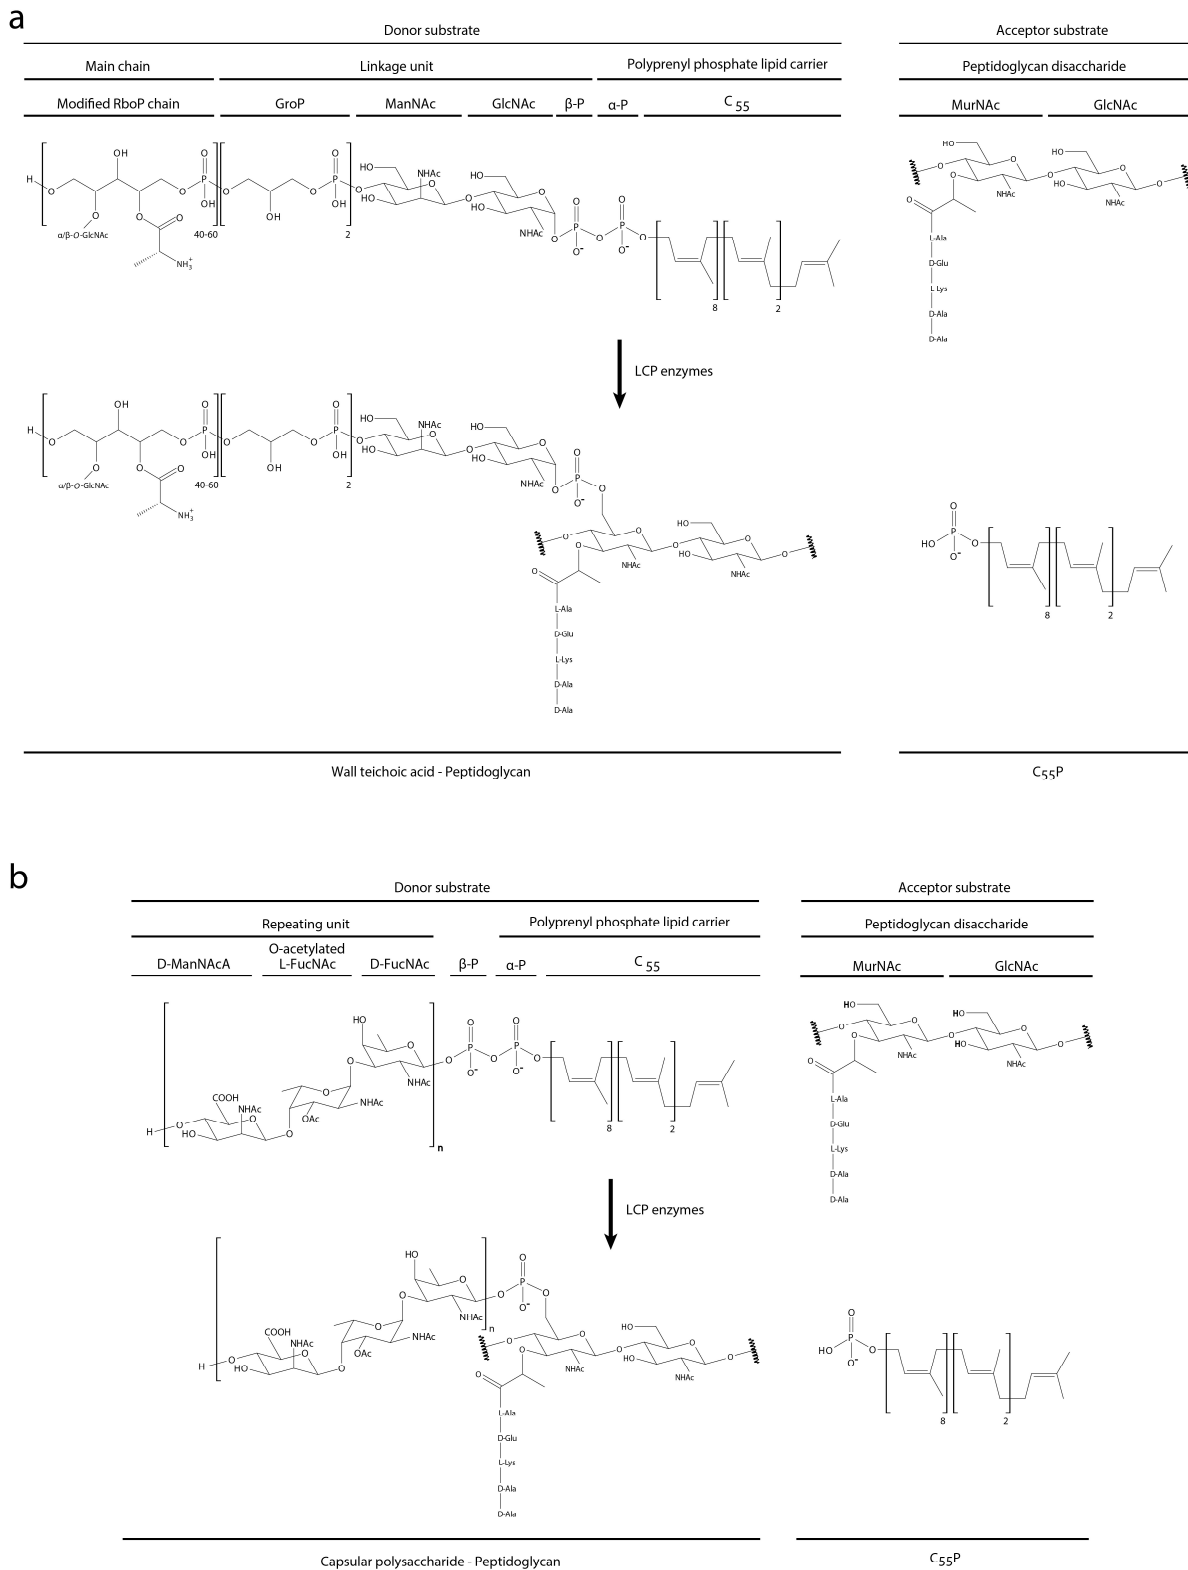

**Figure S1. Chemical structures of *S. aureus* LCP enzyme substrates and products.** LCP enzymes catalyze the transfer of WTA (**a**) and other anionic polymers, such as capsular polysaccharide (**b**), from lipid carriers (commonly C<sub>55</sub>-P) to the C6-hydroxyl group of PG MurNAc.

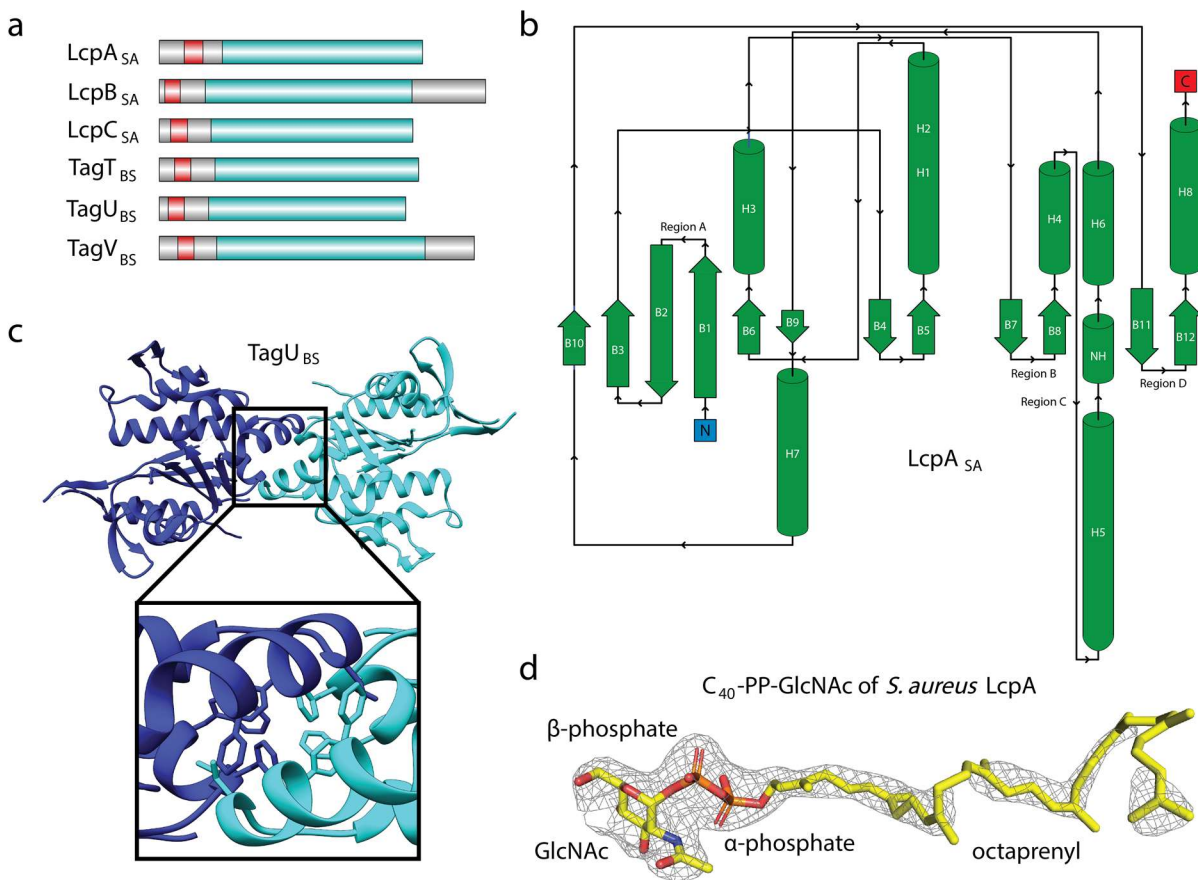

**Figure S2. Domain organization and secondary structure of LCP enzymes.** (a) Domain organization of *S. aureus* (strain N315) and *B. subtilis* (strain 168) LCP enzymes. Transmembrane helices and LCP domains are shown in red and cyan, respectively. (b) Secondary structure diagram of LcpA<sub>SA</sub> (H, helix; B, β-strand; NH, non-conserved helix). (c) Crystal packing of two TagU<sub>BS</sub> monomers. Select residues mediating hydrophobic interactions are depicted as sticks. (d) The lipid bound to LcpA<sub>SA</sub> is shown in yellow with the 2Fo-Fc electron density map contoured to 1σ in a gray mesh. Heteroatoms are coloured by type (O, red; P, orange; N, blue).

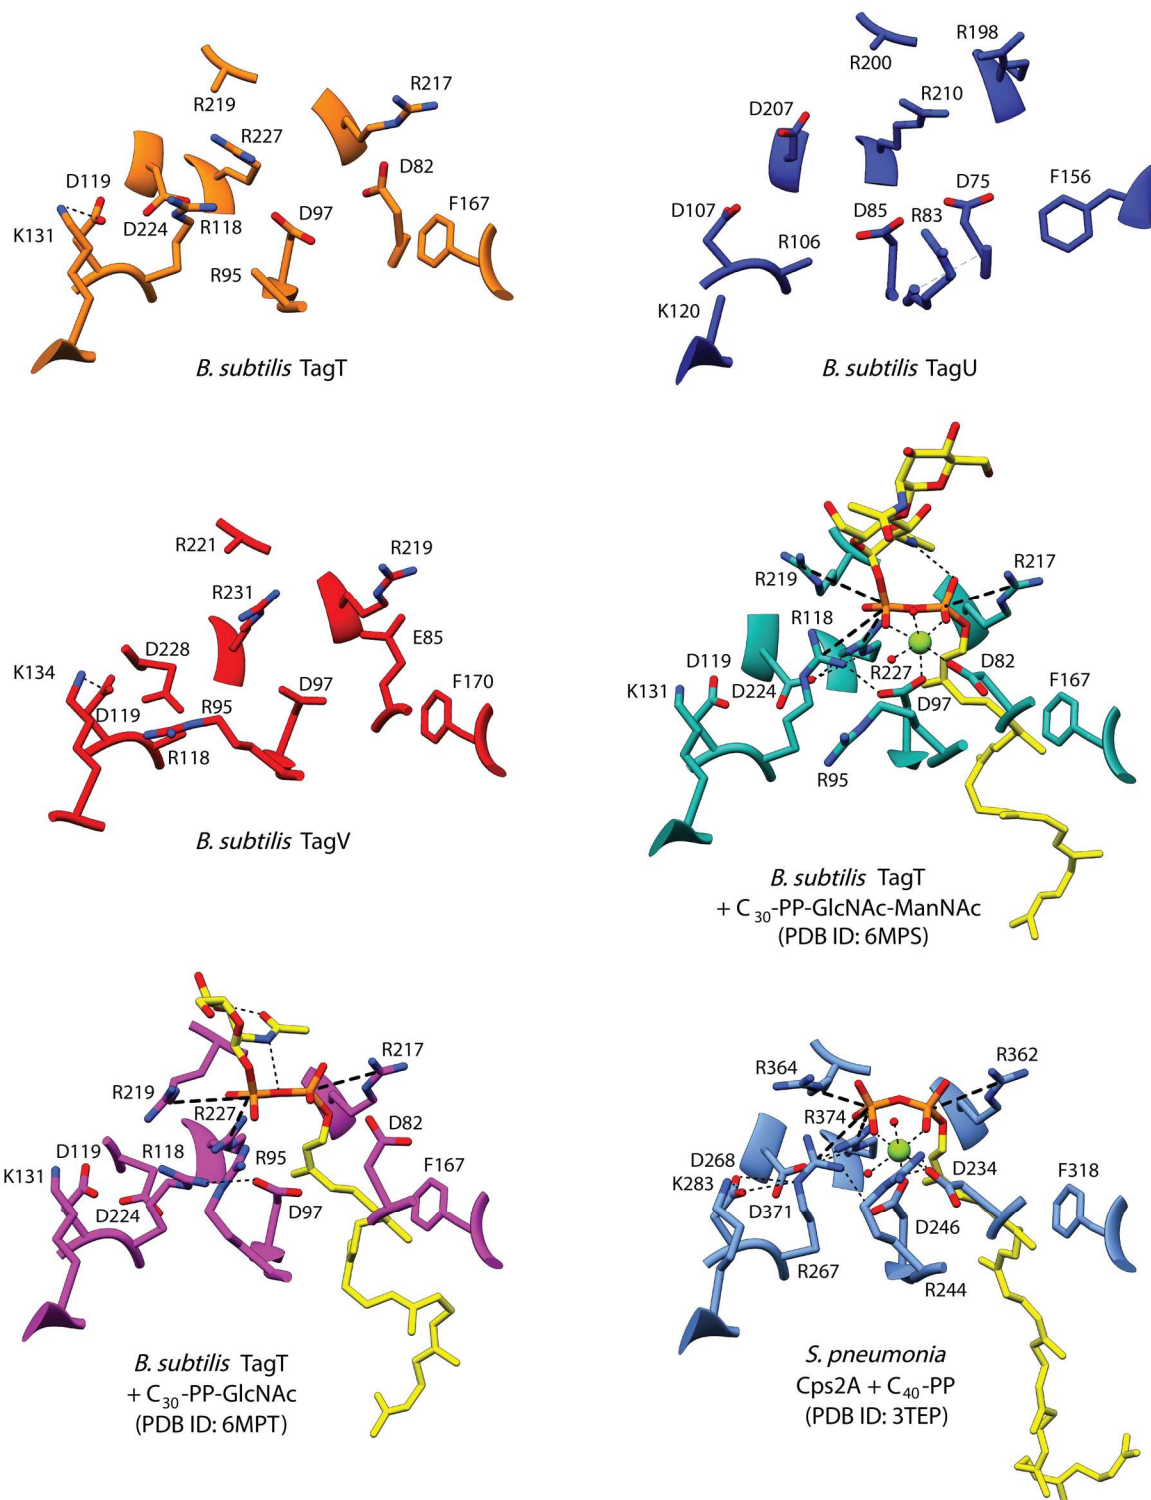

**Figure S3. Pyrophosphate-binding site of LCP enzymes.** Conserved residues surrounding the pyrophosphate moiety of the lipid substrate (yellow) depicted as sticks. Heteroatoms are coloured by type (O, red; P, orange; N, blue; Mg<sup>2+</sup>, green) and bonds are indicated by lines (salt bridges as thick dotted lines; hydrogen bonds and metal-coordinating bonds as thin dotted lines).



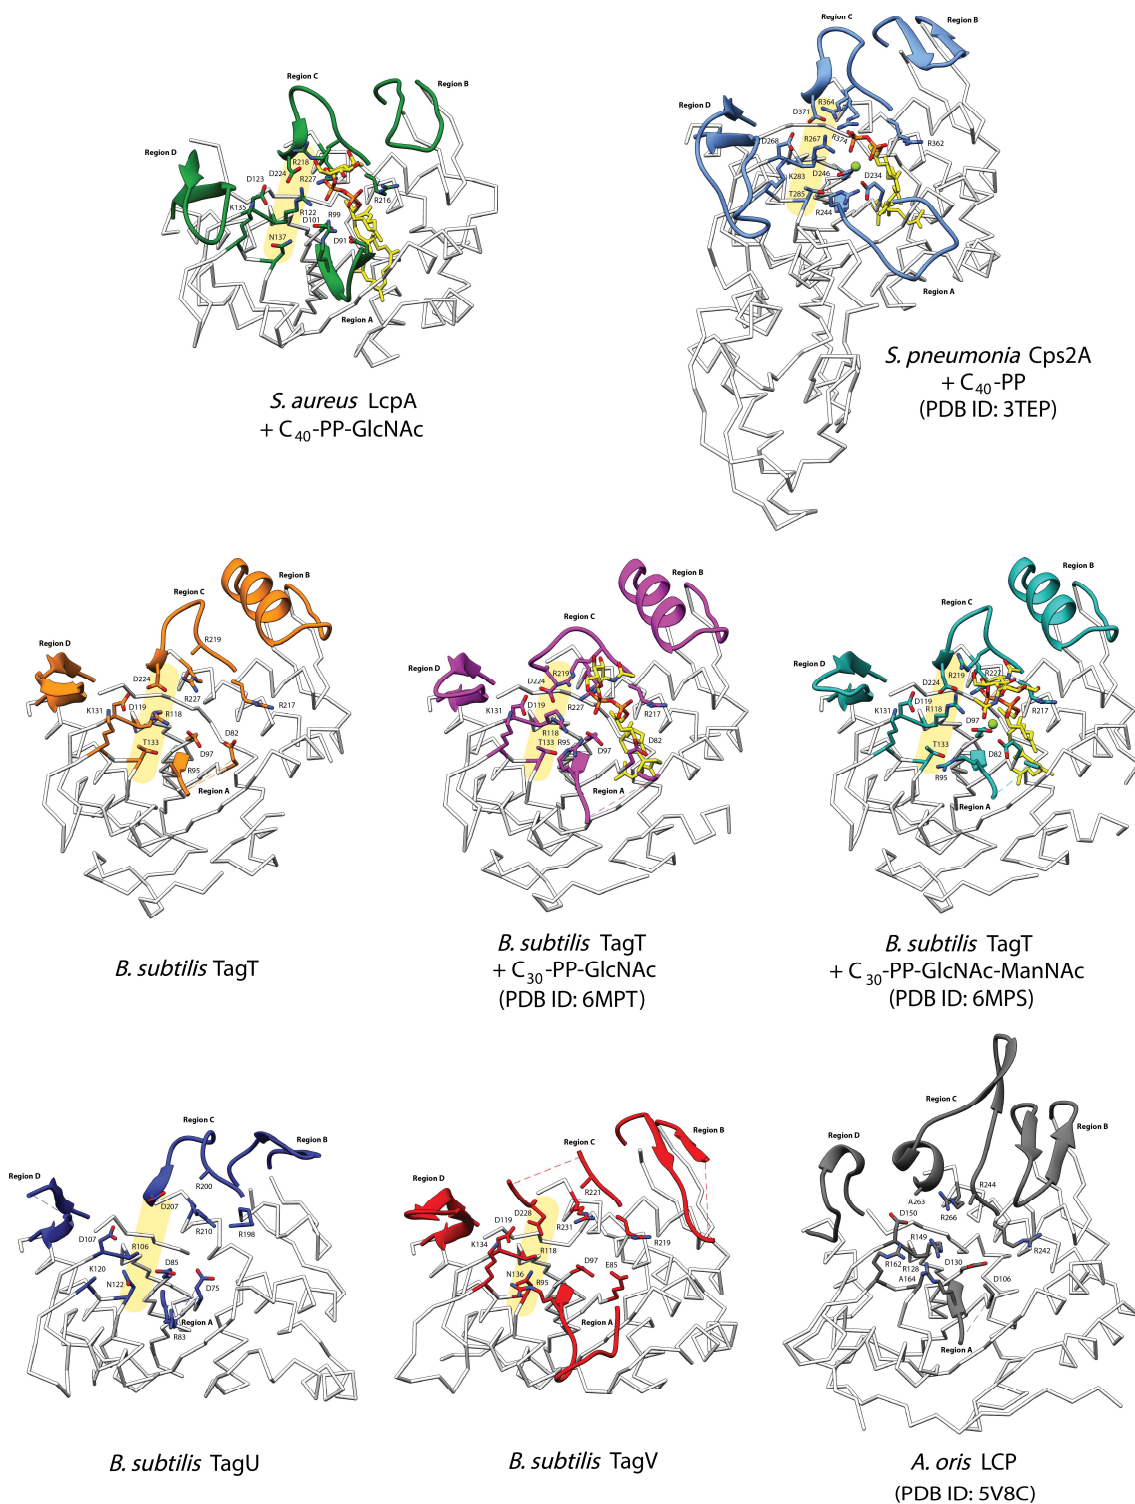

**Figure S4. Structural features surrounding the entrance of the lipid-binding pocket.** Regions A, B, C and D are shown as coloured ribbons, and lipids are depicted in yellow. Select residues are shown as sticks and heteroatoms are coloured by type (O, red; P, orange; N, blue; Mg<sup>2+</sup>, green). The putative PG binding site is highlighted in yellow.

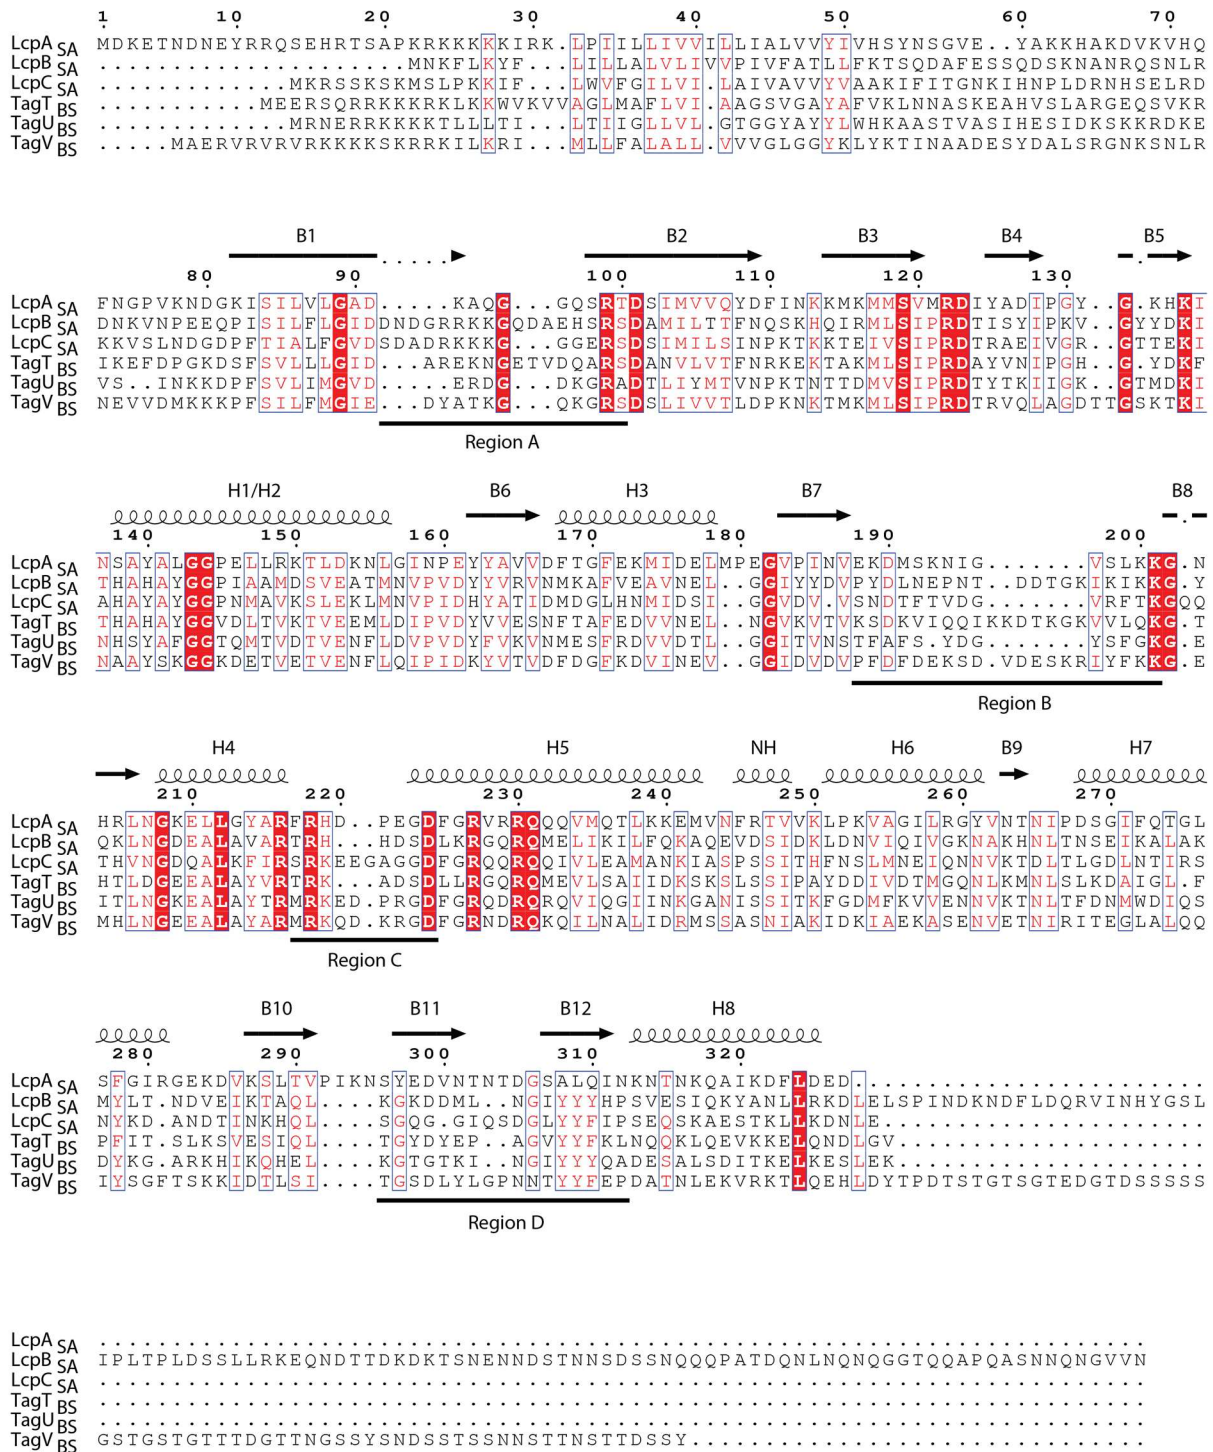

Figure S5. Sequence alignment of *S. aureus* and *B. subtilis* LCP enzymes. Secondary structure of LcpA<sub>SA</sub> is depicted.

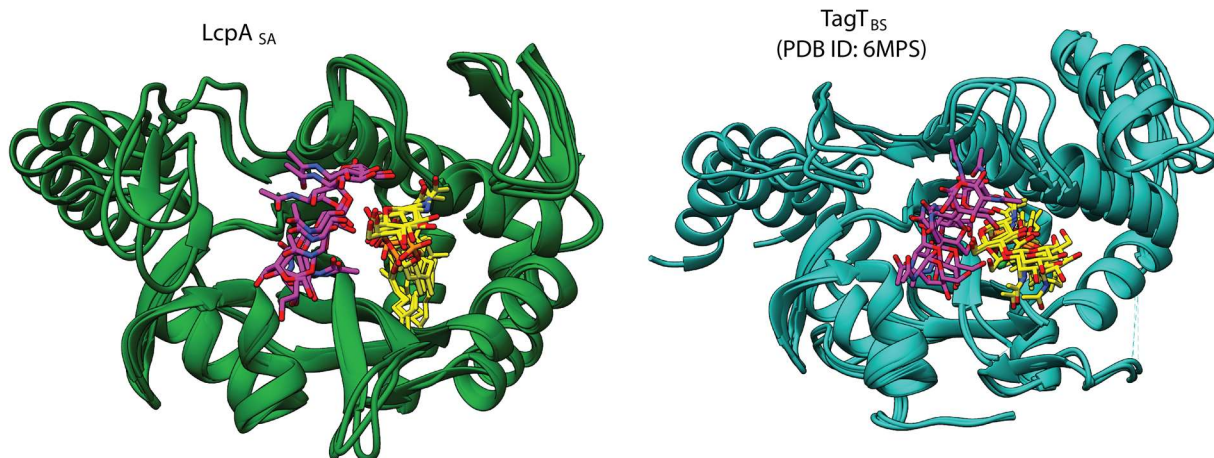

**Figure S6. TriGlcNAc docked onto LcpA<sub>SA</sub> and TagT<sub>BS</sub>.** Ribbon structures of LcpA<sub>SA</sub> (green) and TagT<sub>BS</sub> (PDB ID: 6MPS; cyan) in the top 3 clusters are depicted complexed to triGlcNAc (purple). The highest scoring structure in each cluster is shown. The lipid is in yellow and heteroatoms are coloured by type (O, red; P, orange; N, blue).

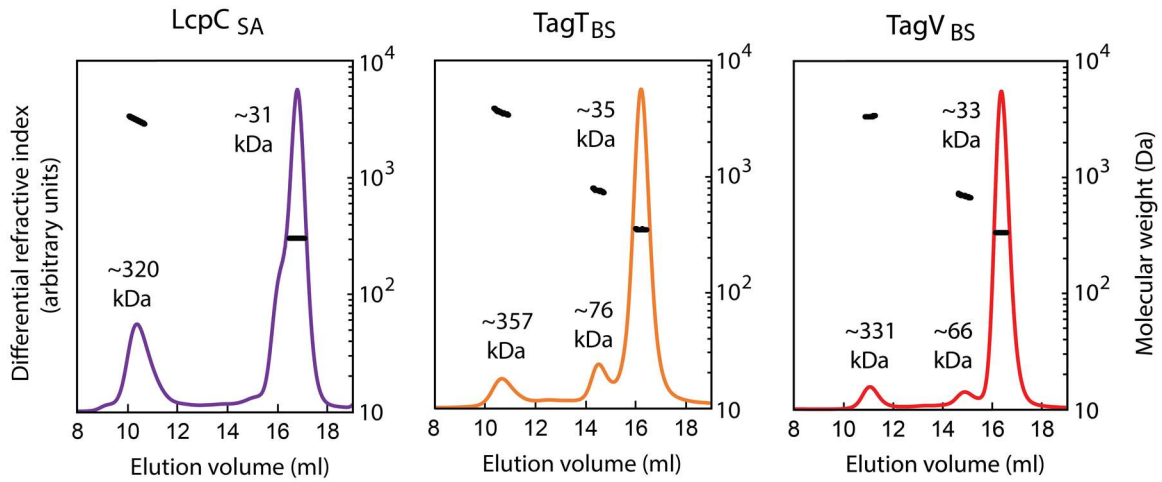

**Figure S7. Oligomerization of *S. aureus* and *B. subtilis* LCP enzymes.** Representative SEC-MALS analyses of  $\Delta$ TM LCP enzymes eluted from a Superdex200 10/300 GL column. The coloured lines represent the differential refractive index, and the black lines correspond to the molecular weight. The average molecular weight from 3 trials is reported.

## References

1. Siegel, S. D., Amer, B. R., Wu, C., Sawaya, M. R., Gosschalk, J. E., Clubb, R. T., and Ton-That, H. (2019) Structure and Mechanism of LcpA, a Phosphotransferase That Mediates Glycosylation of a Gram-Positive Bacterial Cell Wall-Anchored Protein. *MBio.* **10**, 1–16
2. Schaefer, K., Owens, T. W., Kahne, D., and Walker, S. (2018) Substrate Preferences Establish the Order of Cell Wall Assembly in *Staphylococcus aureus*. *J. Am. Chem. Soc.* **140**, 2442–2445
3. Eberhardt, A., Hoyland, C. N., Vollmer, D., Bisle, S., Cleverley, R. M., Johnsborg, O., Håvarstein, L. S., Lewis, R. J., and Vollmer, W. (2012) Attachment of capsular polysaccharide to the cell wall in *Streptococcus pneumoniae*. *Microb. Drug Resist.* **18**, 240–55
4. Kawai, Y., Marles-Wright, J., Cleverley, R. M., Emmins, R., Ishikawa, S., Kuwano, M., Heinz, N., Bui, N. K., Hoyland, C. N., Ogasawara, N., Lewis, R. J., Vollmer, W., Daniel, R. a, and Errington, J. (2011) A widespread family of bacterial cell wall assembly proteins. *EMBO J.* **30**, 4931–41
5. Baumgart, M., Schubert, K., Bramkamp, M., and Frunzke, J. (2016) Impact of LytR-CpsA-Psr Proteins on Cell Wall Biosynthesis in *Corynebacterium glutamicum*. *J. Bacteriol.* **198**, 3045–3059
6. Katayama, Y., Sekine, M., Hishinuma, T., Aiba, Y., and Hiramatsu, K. (2016) Complete Reconstitution of the Vancomycin-Intermediate *Staphylococcus aureus* Phenotype of Strain Mu50 in Vancomycin-Susceptible *S. aureus*. *Antimicrob. Agents Chemother.* **60**, 3730–42
